# Supplementary material for: Estimating global geographical distribution and ecological niche dynamics of Ammannia coccinea under climate change based on Biomod2
Source: PubMed Central journal article supplement — Sci Rep. 2024 Dec 20;14:30579. doi: 10.1038/s41598-024-82164-6 (PMC11662028; doi:10.1038/s41598-024-82164-6), 2024-12-20
Supplement: 41598_2024_82164_MOESM3_ESM.pdf [file 41598_2024_82164_MOESM3_ESM.pdf]

# Variables - PCA

SSP126-2050s

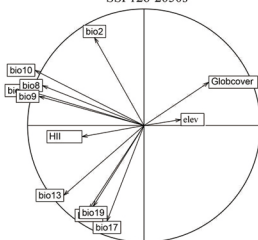

PC1 = 38.08 % PC2 = 23.21 %

SSP245-2050s

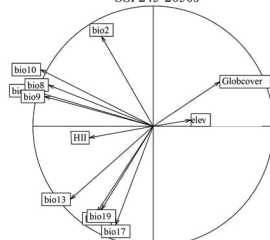

PC1 = 38.05 % PC2 = 23.22 %

SSP585-2050s

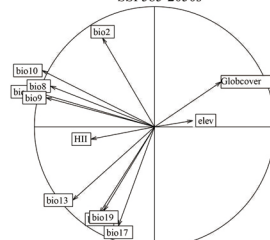

PC1 = 37.78 % PC2 = 23.2 %

SSP126-2070s

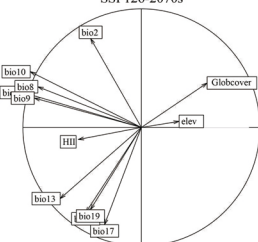

PC1 = 38.1 % PC2 = 23.18 %

SSP245-2070s

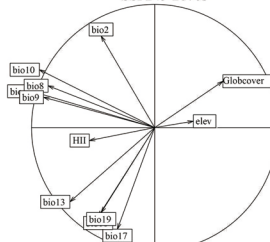

PC1 = 37.91 % PC2 = 23.18 %

SSP585-2070s

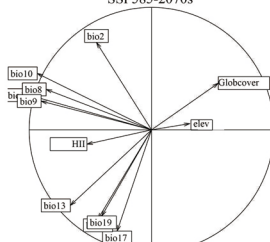

PC1 = 37.4 % PC2 = 23.21 %

SSP126-2090s

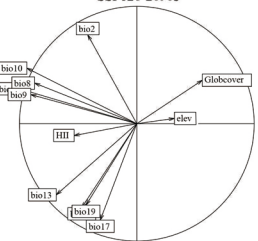

PC1 = 38.01 % PC2 = 23.32 %

SSP245-2090s

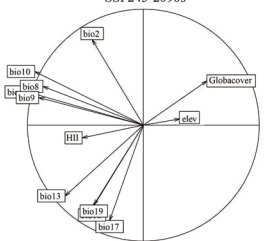

PC1 = 37.75 % PC2 = 23.15 %

SSP585-2090s

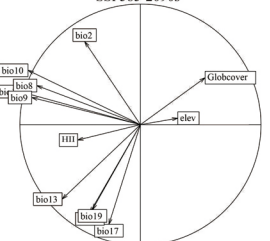

PC1 = 37.11 % PC2 = 23.01 %
