# Supplementary figures and images for: Estimating global geographical distribution and ecological niche dynamics of Ammannia coccinea under climate change based on Biomod2
Source: PubMed Central journal article supplement — Sci Rep. 2024 Dec 20;14:30579. doi: 10.1038/s41598-024-82164-6 (PMC11662028; doi:10.1038/s41598-024-82164-6), 2024-12-20

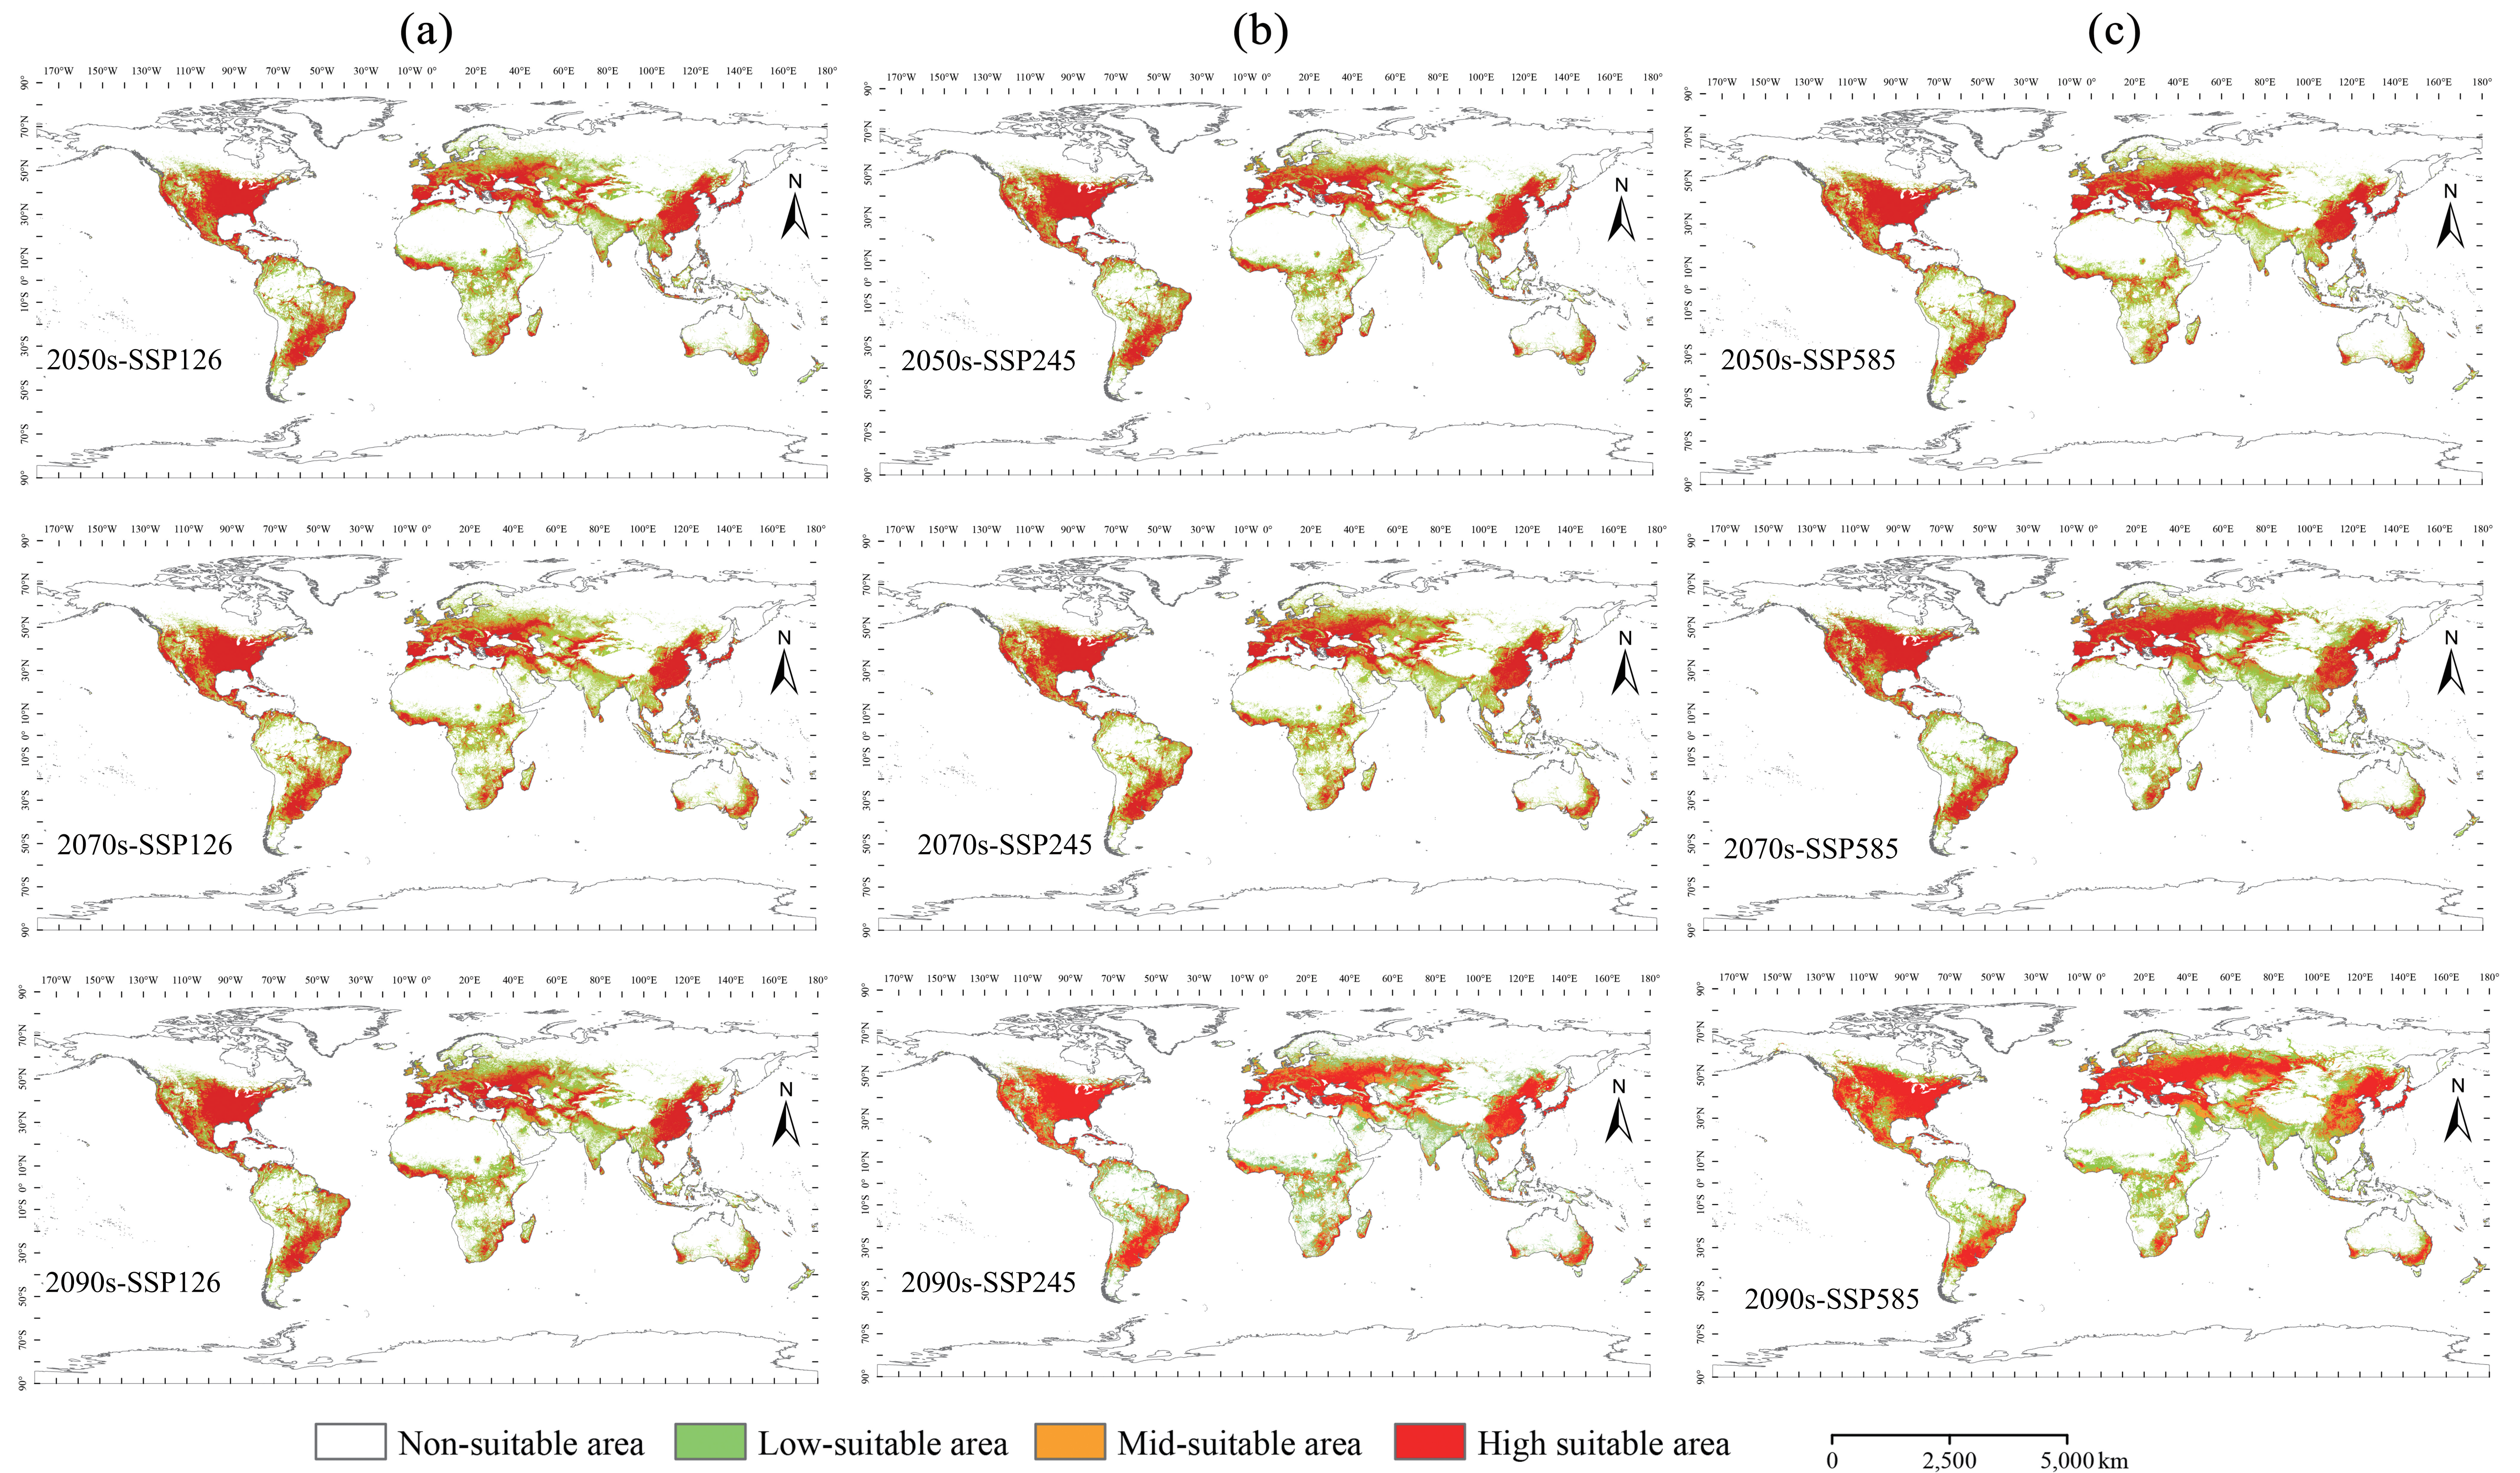

Supplement: 41598_2024_82164_MOESM1_ESM.pdf [file 41598_2024_82164_MOESM1_ESM.pdf]

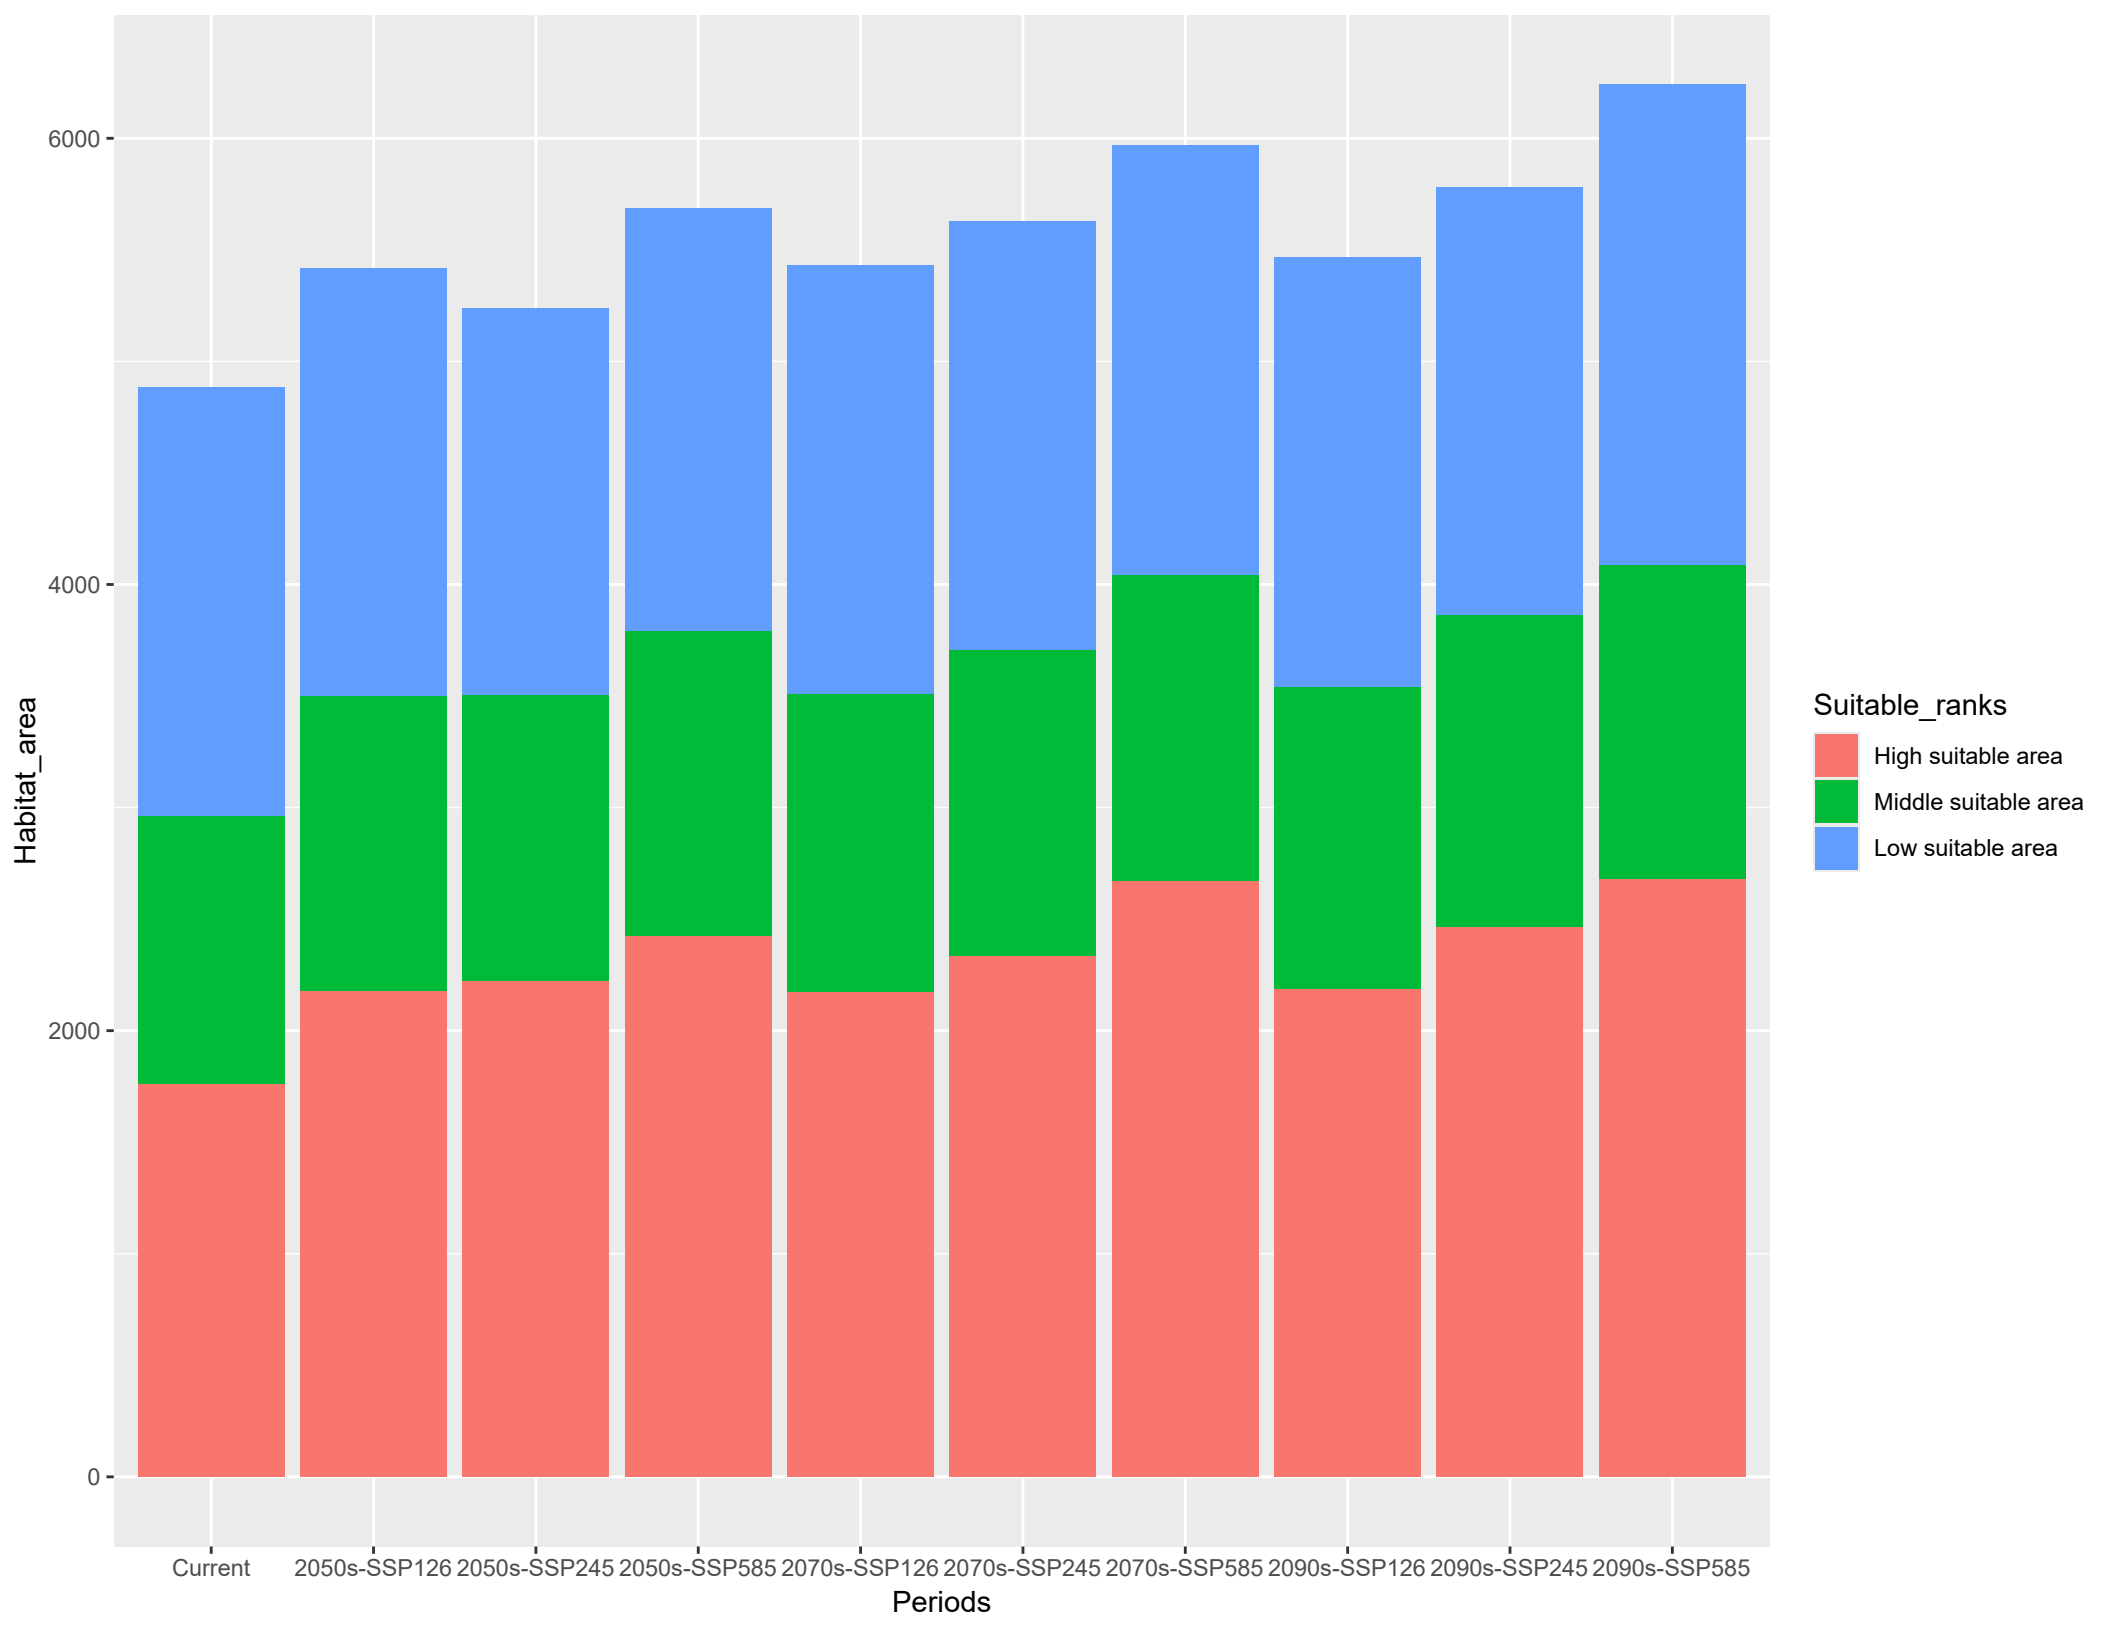

Supplement: 41598_2024_82164_MOESM2_ESM.pdf [file 41598_2024_82164_MOESM2_ESM.pdf]
